# Supplementary material for: Continuous odor profile monitoring to study olfactory navigation in small animals
Source: eLife. 2023 Jul 25;12:e85910. doi: 10.7554/eLife.85910 (PMC10425172; doi:10.7554/eLife.85910)
Supplement: Figure 2—source data 1. — Table odor_physics.xlsx in https://doi.org/10.6084/m9.figshare.21737303. [file elife-85910-fig2-data1.xlsx]

## Sheet: Sheet1
Physcal properties of the odorants at room temperature (25C)
Odorant	Molecular weight (g/mol)	Vapor pressure (kPa)	Water solubility (g/100 ml)
Butanone	72.11	12.6	34.4
Ethyl butyrate	116.16	2.01	0.49
Benzaldehyde	106.12	0.17	0.3
Ethanol	46.06	7.87	Miscible
reference: Haynes, William M. CRC handbook of chemistry and physics. CRC press, 2016.
