# Supplementary material for: Continuous odor profile monitoring to study olfactory navigation in small animals
Source: eLife. 2023 Jul 25;12:e85910. doi: 10.7554/eLife.85910 (PMC10425172; doi:10.7554/eLife.85910)
Supplement: Supplementary file 2. — Also available at https://doi.org/10.6084/m9.figshare.21737303 [file elife-85910-supp2.xlsx]

## Sheet: flowpath
source	part#	description	qty	note
mcmaster	9557K208	dash170 epdm o-ring pk of 5	1 pack
	9557K214	dash175 epdm o-ring pk of 5	1 pack
	77595A32	3/8" adhesive-backed polyimide discs, 100 pk	1 pack	covers though holes if bottom plate is laser cut
idex-upchurch	XF-368x	Flangeless Fitting for 1/8” OD Tubing, FlushNut, pk of 10	3 packs	includes ferrules
	XP-300x	Flangeless Ferrule for 1/8” OD Tubing, pk of 10	2 packs
	P-946x	VacuTight Fitting for 1/8” OD Tubing, headless, pk of 10, delrin red	3 packs	acetal has "c-fair" compatibility with MEK
	p-940x	VacuTight Ferrule for 1/8” OD Tubing, pk of 10, ETFE red	2 packs
	F-346	FlushNut Wrench for 1/4-28 Threaded Fittings	1
	P-321	Plug for 1/4-28 Flat-Bottom Ports, FlushNut, PEEK natural	30
	P-311	Plug for 1/4-28 Flat-Bottom Ports, ETFE natural	5
	P-190	PEEK 9-Port Manifold for 1/8” OD Tubing	4	for air distribution; other manifolds could be used - see clippard below
	P-713	PEEK Tee for 1/8” OD Tubing	3	for air distribution; other tees could be used - see clippard below
swagelok	PFA-T2-030-100	PFA Tubing, 1/8 in. OD x 0.030 in. Wall x 100 Feet	1 box of 100 feet	could spend 3x as much for the same tubing at upchurch
	B-41XS2	Brass 1-Piece 40 Series 3-Way Ball Valve, 0.15 Cv, 1/8 in. Swagelok Tube Fitting	1	to switch vacuum seal on lid
		other fittings you'll need to connect MFC to distribution, outlets to exhaust, vacuum to vacuum valve; tubing (if not 1/8") tube cutter, etc.
clippard	MAN-12	12-Port manifold, brass	4
	11923-PKG	10-32 to 1/8" tube connector, brass 10-pk	4
	11755-PKG	Screw Plug, Pack of 10	4
	11761-7-PKG	EPDM gasket, pack of 25	8
	17555	mimimatic fittings kit	optional - good to have in the lab
fisher, sigma, etc.	22668-U	swagelok fittings kit	optional - good to have in the lab
local vendor		10"x7"x1/4" glass for lid
Milkerson	M03 Series Port Sizes 1/8, 1/4; Flows to 20 SCFM		1	connected to preasurize air source
	F08 Series MODULAR Port Sizes 1/4; Flows to 42 SCFM		1

## Sheet: sensors
source	part#	description	qty	note
Aalborg	GFCS-010654	0-50 ml/min and 0-5 L/min	1 for each range
	Model P single flow tube meters	112-02-A flow tube with Qmax= 816.030	can be adjusted depending on working flow rate
	OSV1-1-P	optical flow sensor	1
Ametek / mocon	piD-TECH	Yellow (0-200 ppm) and Purple (0-2000 ppm)	1 for each range	We use 10.6 eV PID. Please check the data sheet for list of detectable volatile compounds
	piD-TECH piD-POD		1
Graftek Imaging	Basler acA4112-30um		1
Sensirion	SGP30	check odor sensor array tutorial for the PCB design	116 for the full array
LightingWill	B01DM9BL5I	InfraRed 850nm Tri-chip White PCB Flexible LED Strips 60LEDs 14.4W/M	1
DROK	90483	voltage regulator for LED strip	1
PJRC	Teensy 4.0		2	one for each sensor bus
LabJack	LabJack U3-HV		1
CCTV lens	LM16FC	1.1'' 16mm/F11.8	1	can be adjusted depending on setup
