# Supplementary figures and images for: Continuous odor profile monitoring to study olfactory navigation in small animals
Source: eLife journal article supplement (doi:10.7554/elife.85910), 2023-07-25

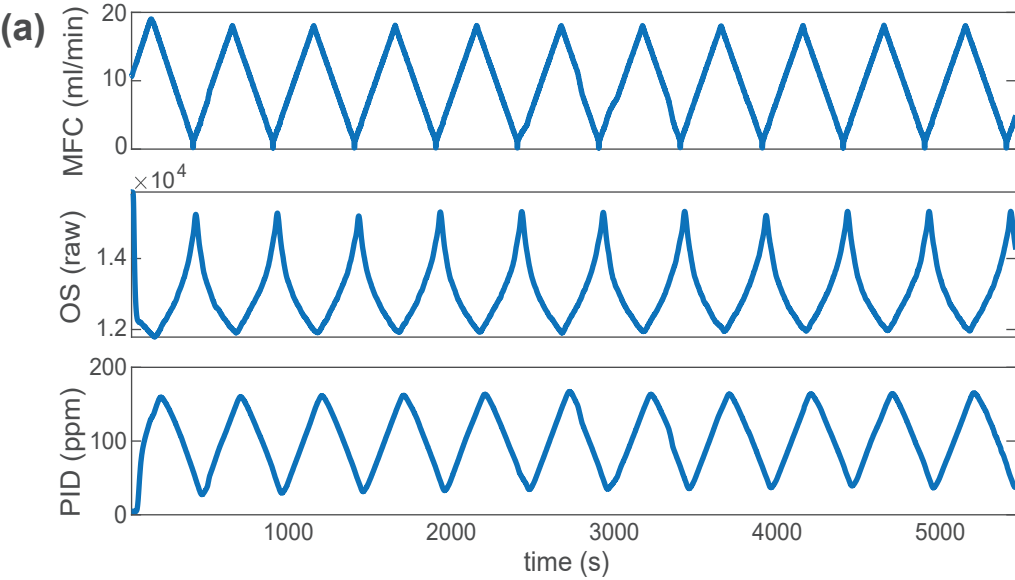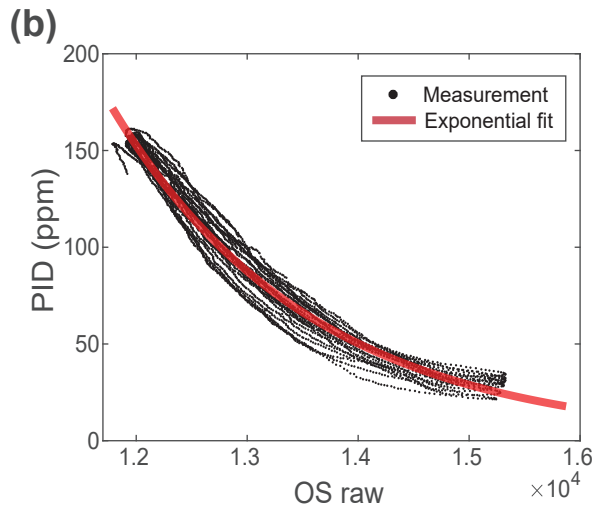

Supplement: supp [file elife_poa_e85910_Figure_1_figure_supplement_1.pdf › elife_poa_e85910_Figure_1_figure_supplement_1.pdf]

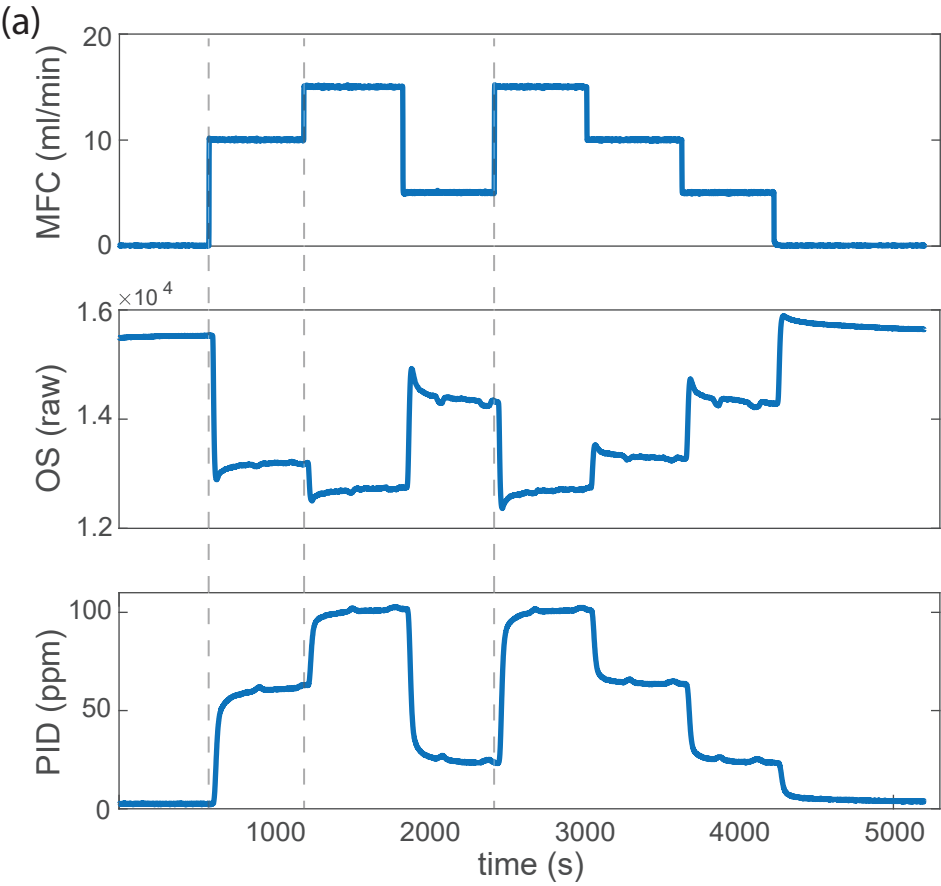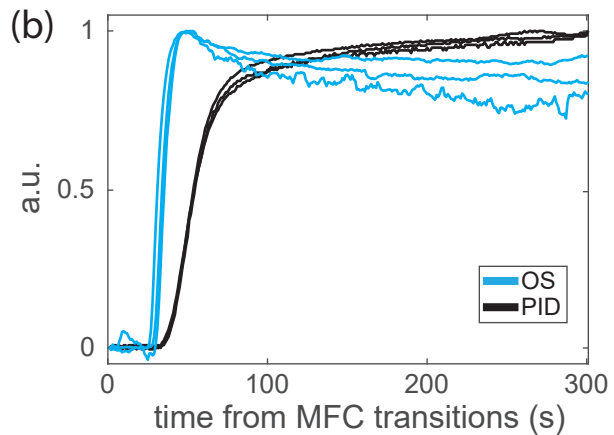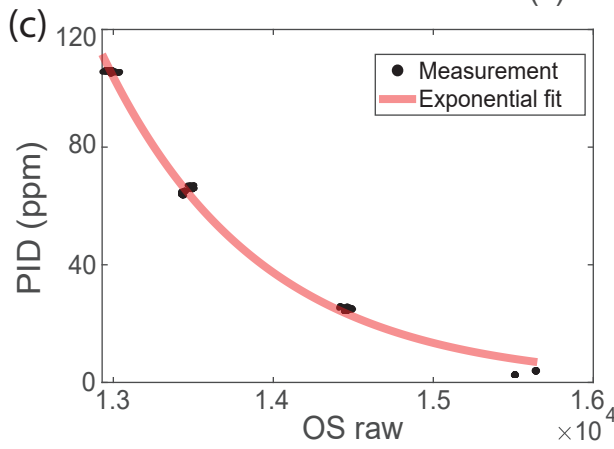

Supplement: supp [file elife_poa_e85910_Figure_1_figure_supplement_2.pdf › elife_poa_e85910_Figure_1_figure_supplement_2.pdf]

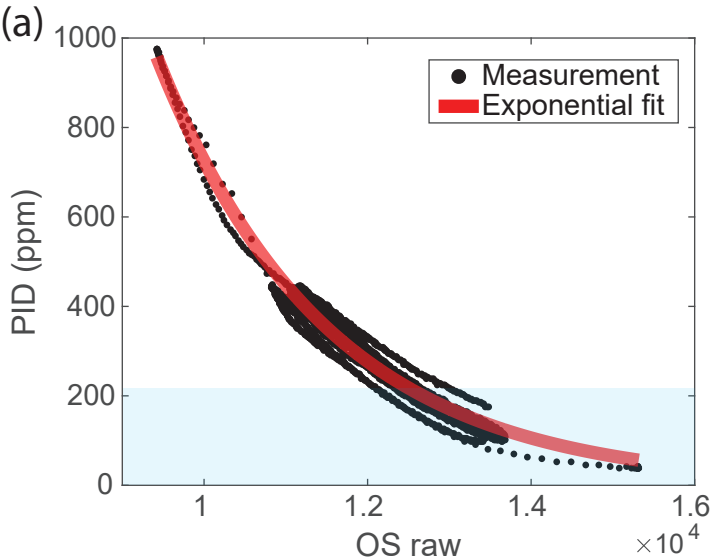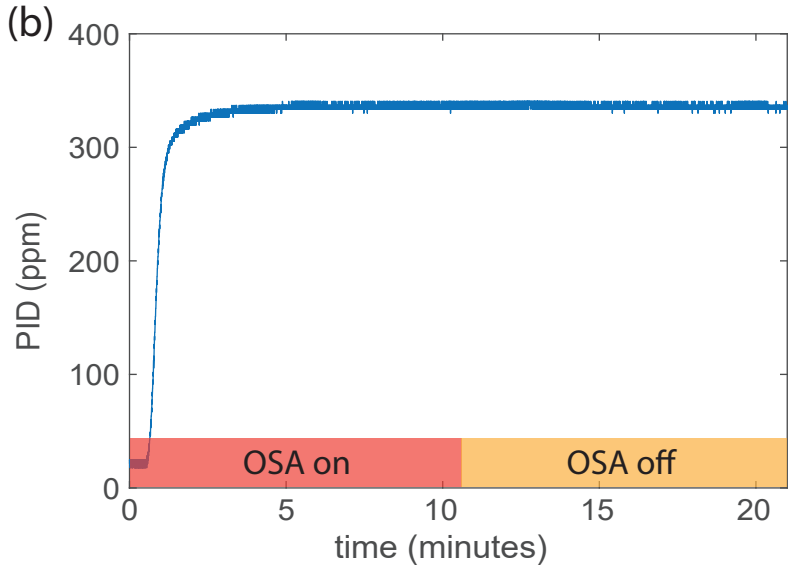

Supplement: supp [file elife_poa_e85910_Figure_1_figure_supplement_3.pdf › elife_poa_e85910_Figure_1_figure_supplement_3.pdf]

(a)

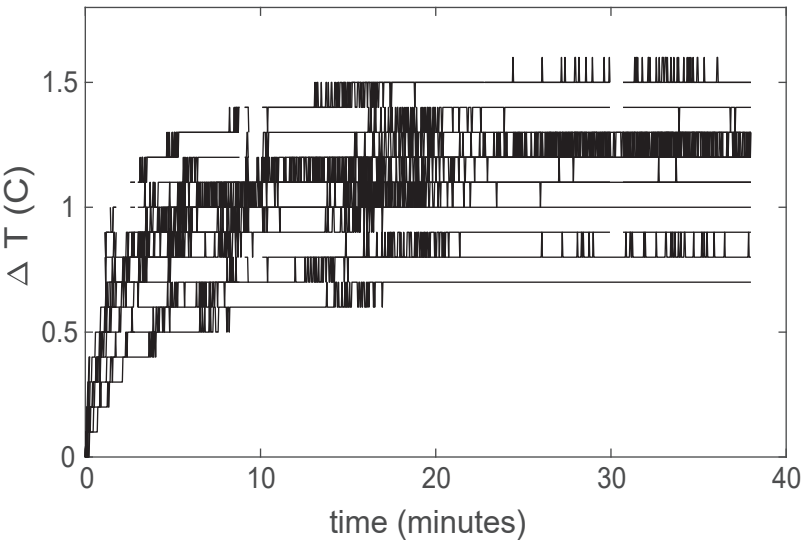

(b)

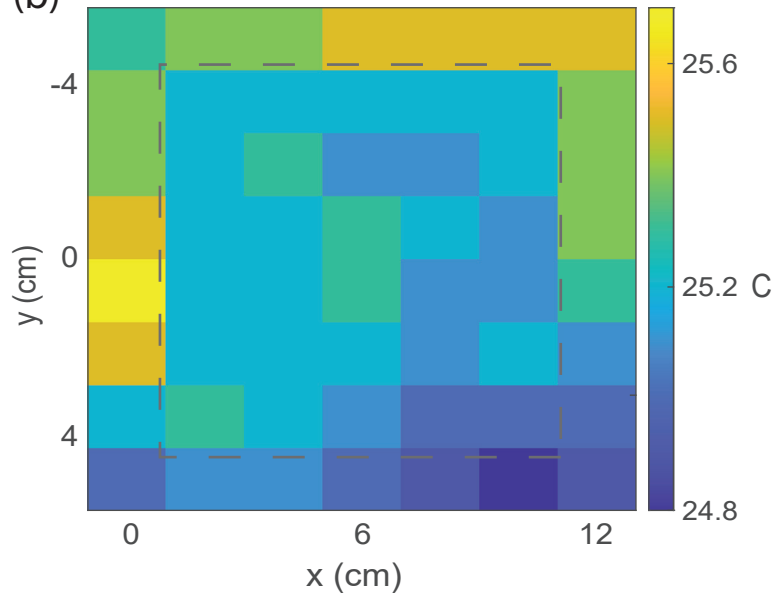

Supplement: supp [file elife_poa_e85910_Figure_1_figure_supplement_4.pdf › elife_poa_e85910_Figure_1_figure_supplement_4.pdf]

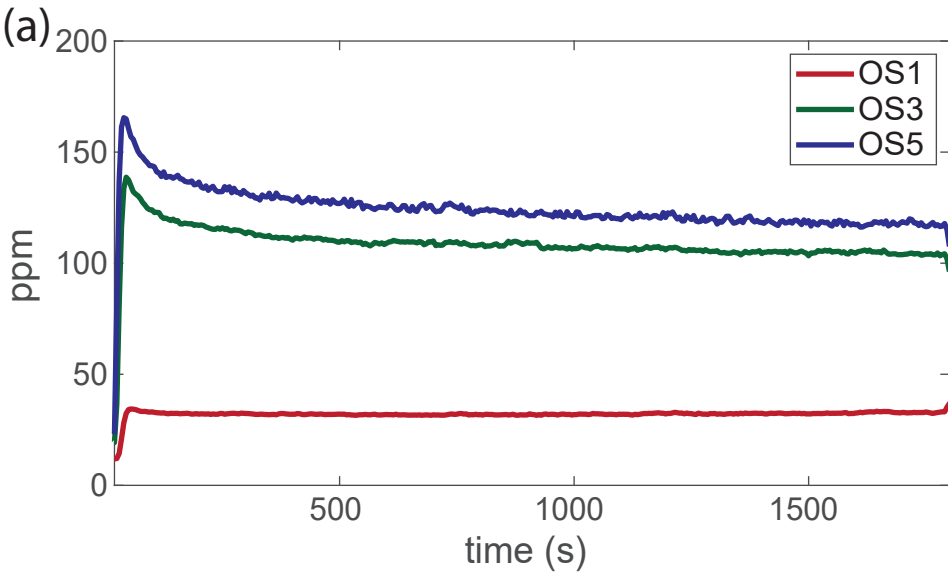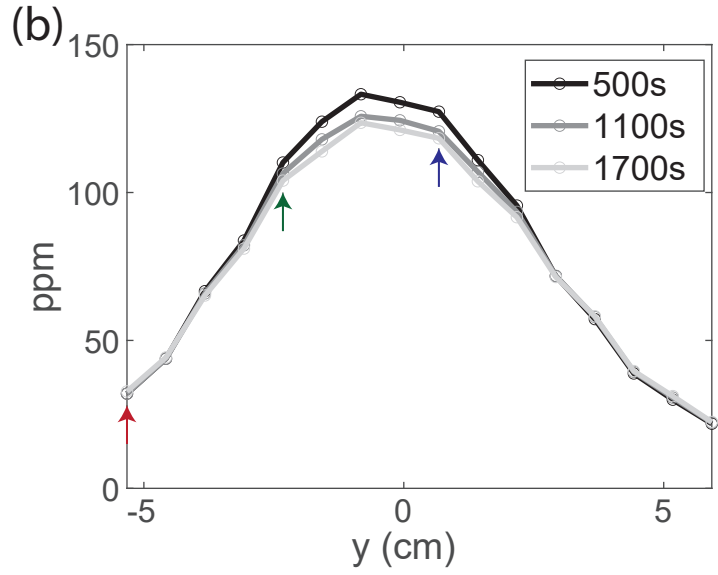

Supplement: supp [file elife_poa_e85910_Figure_1_figure_supplement_5.pdf › elife_poa_e85910_Figure_1_figure_supplement_5.pdf]

(a)

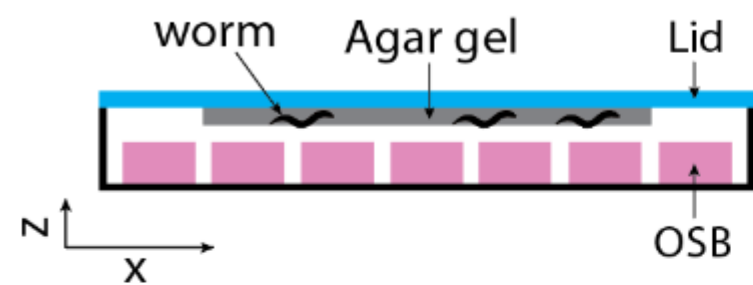

(b)

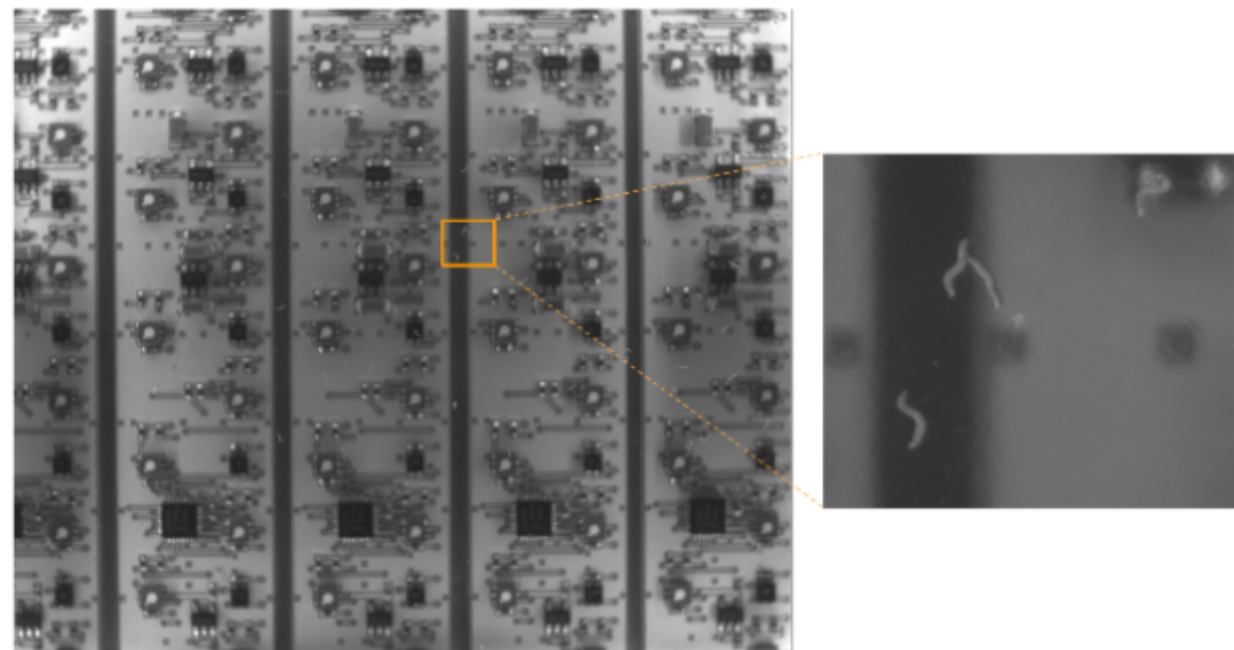

(c)

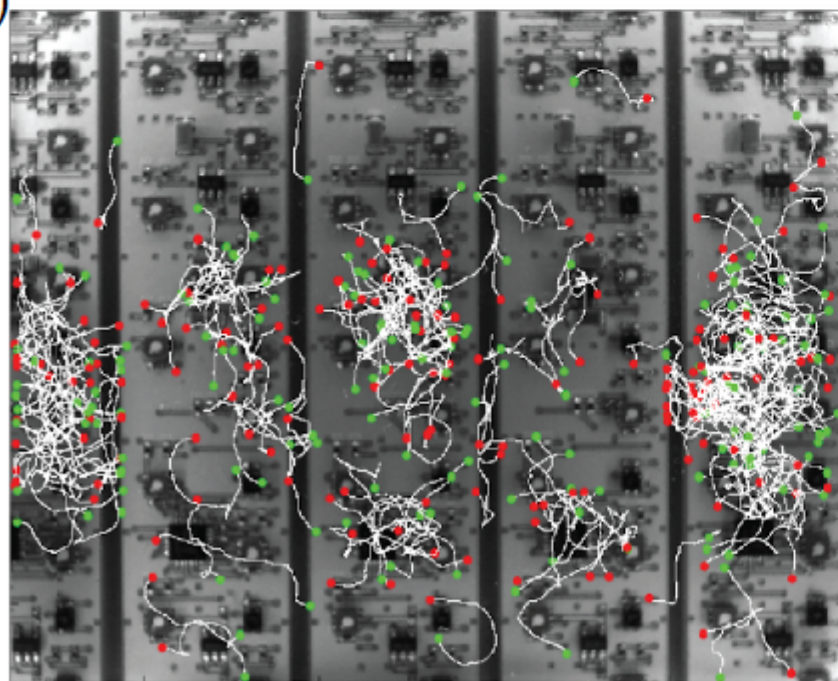

(d)

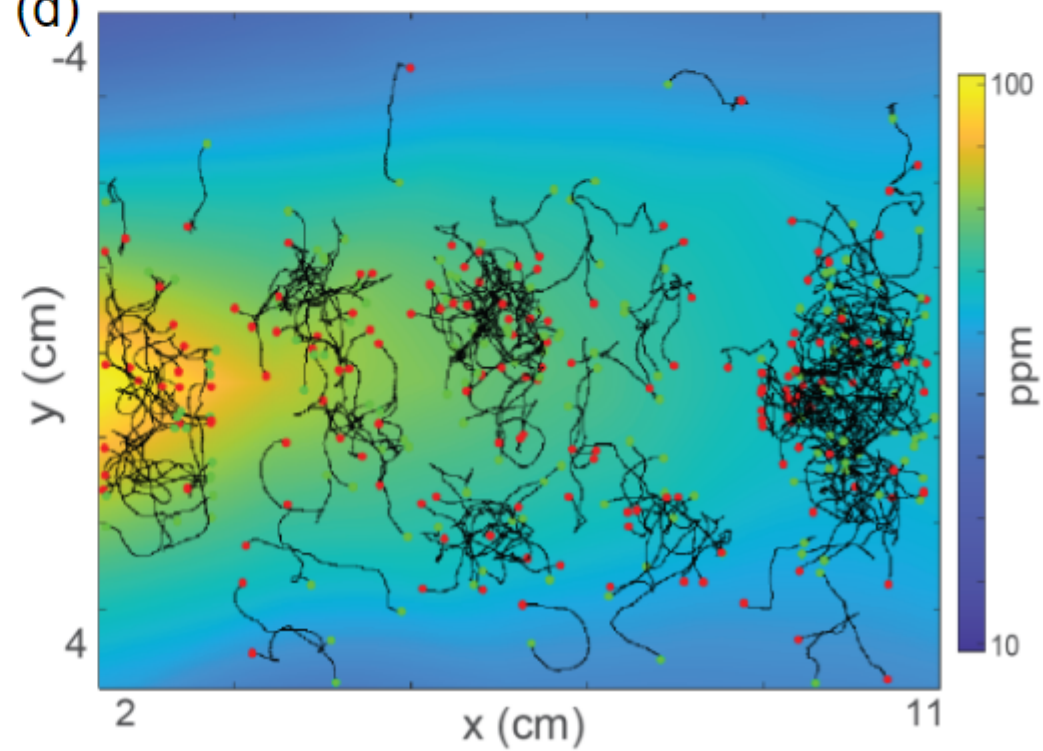

Supplement: supp [file elife_poa_e85910_Figure_1_figure_supplement_6.pdf › elife_poa_e85910_Figure_1_figure_supplement_6.pdf]

(a)

Benzaldehyde

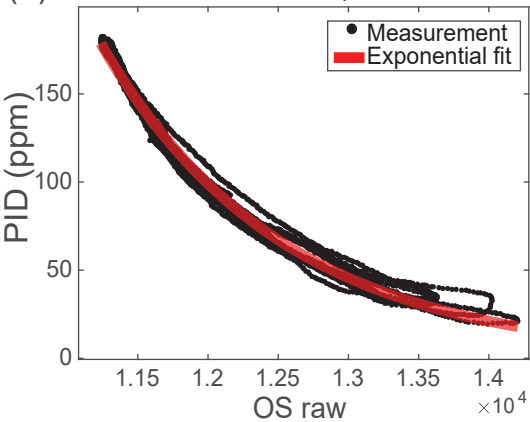

(b)

Ethanol

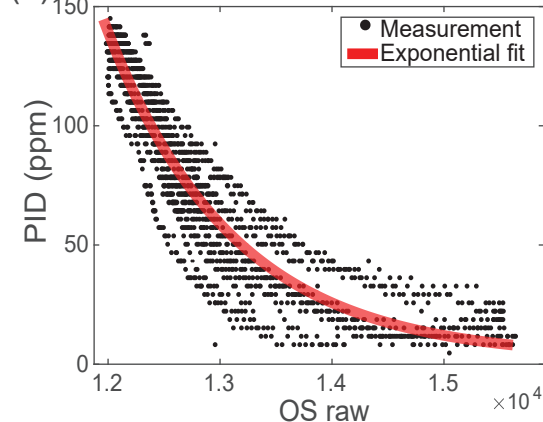

(c)

Ethyl butyrate

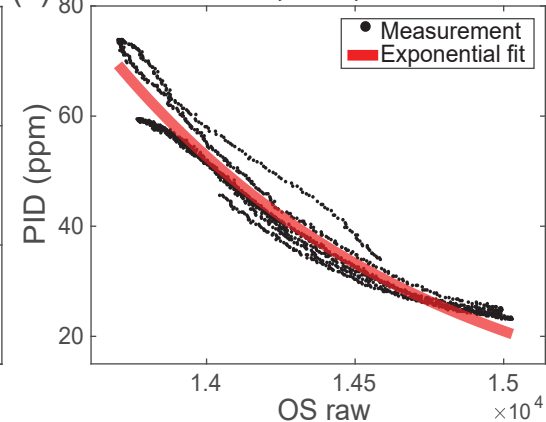

Supplement: supp [file elife_poa_e85910_Figure_2_figure_supplement_1.pdf › elife_poa_e85910_Figure_2_figure_supplement_1.pdf]

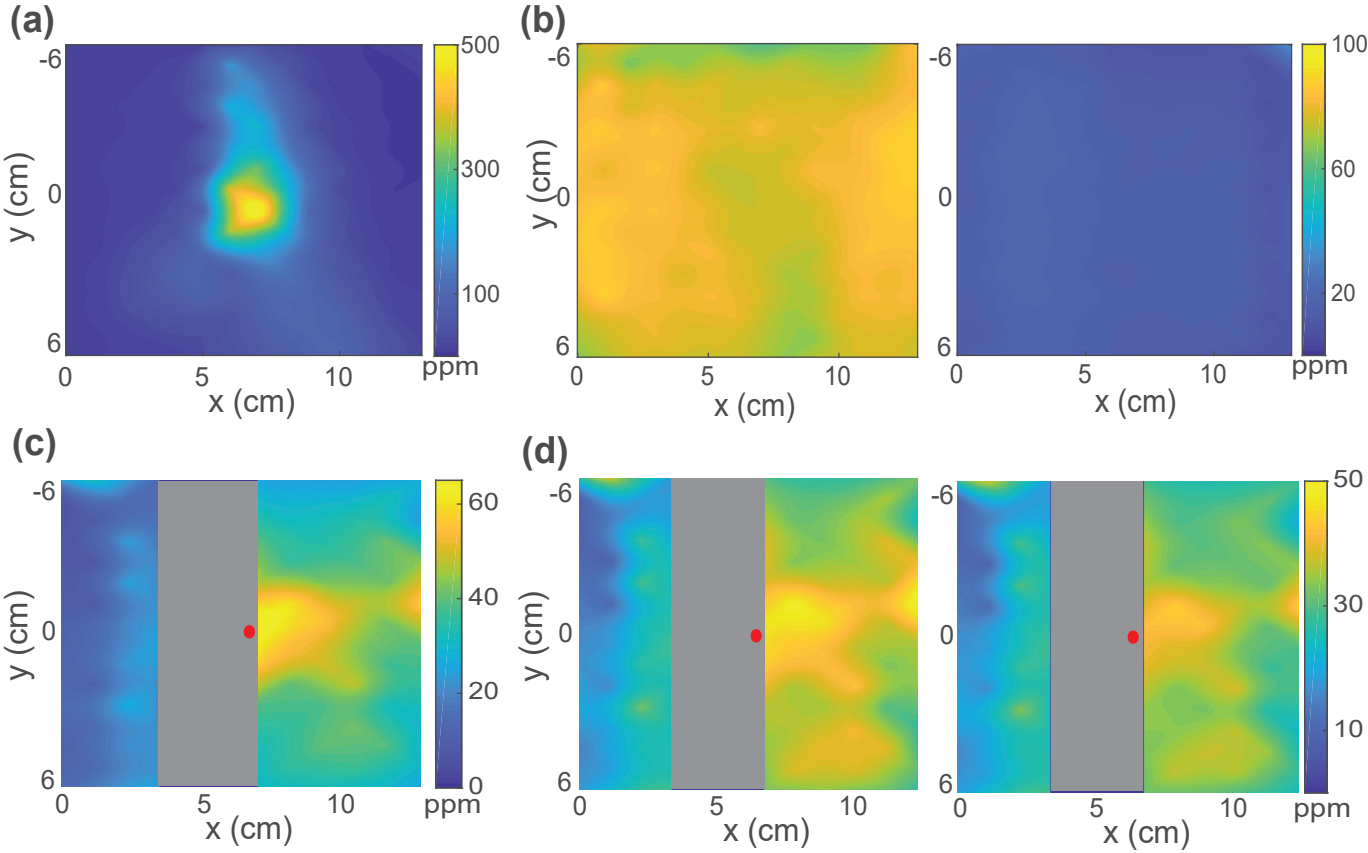

Supplement: supp [file elife_poa_e85910_Figure_3_figure_supplement_1.pdf › elife_poa_e85910_Figure_3_figure_supplement_1.pdf]

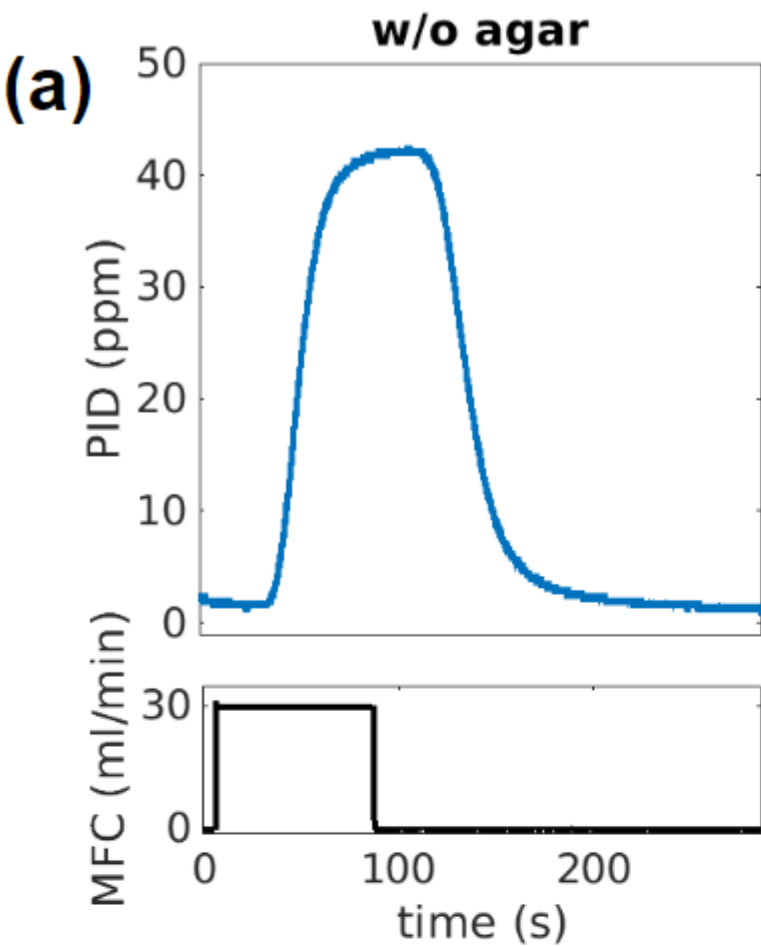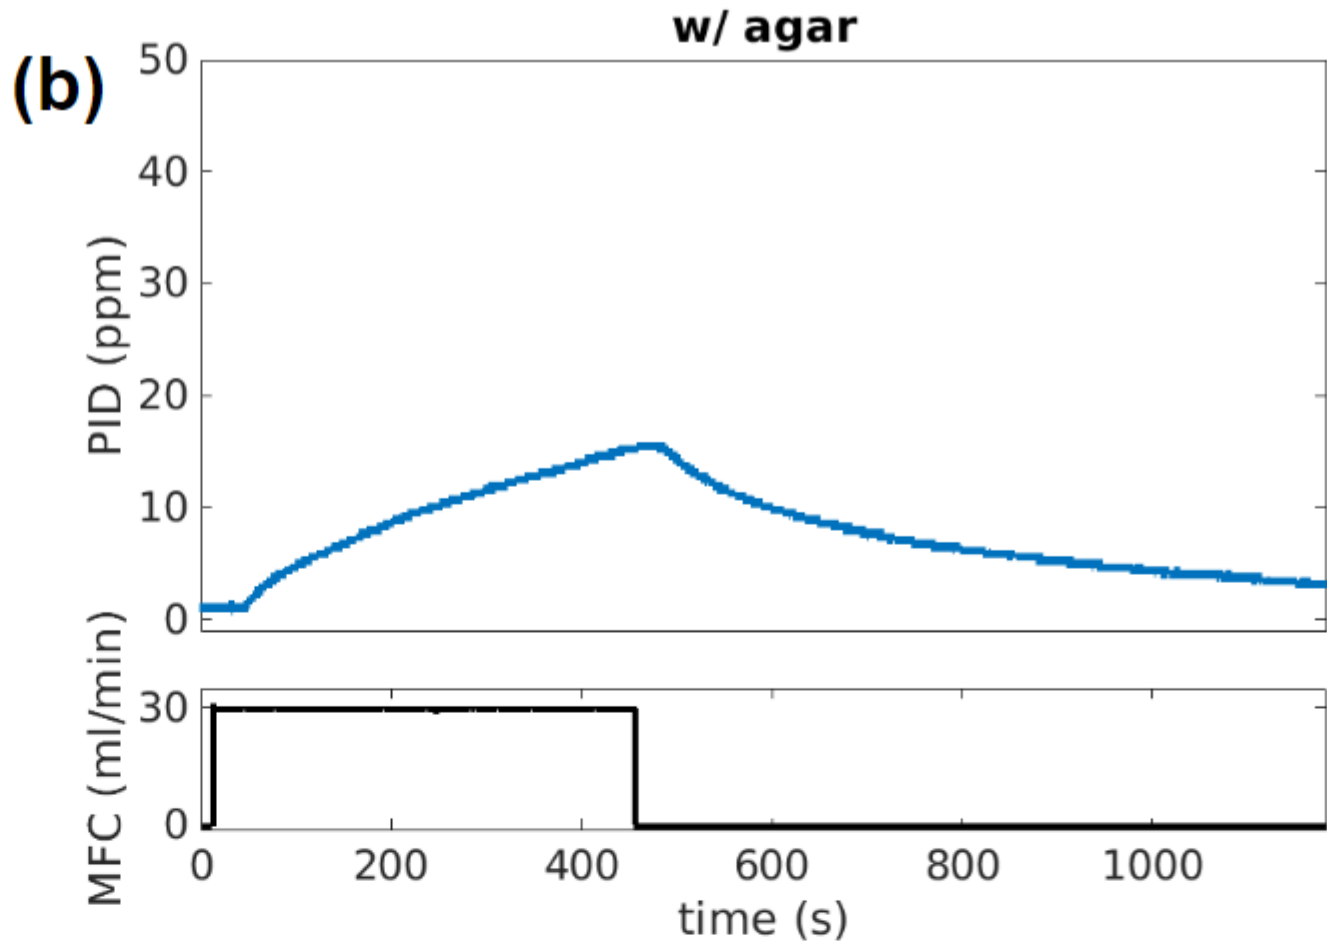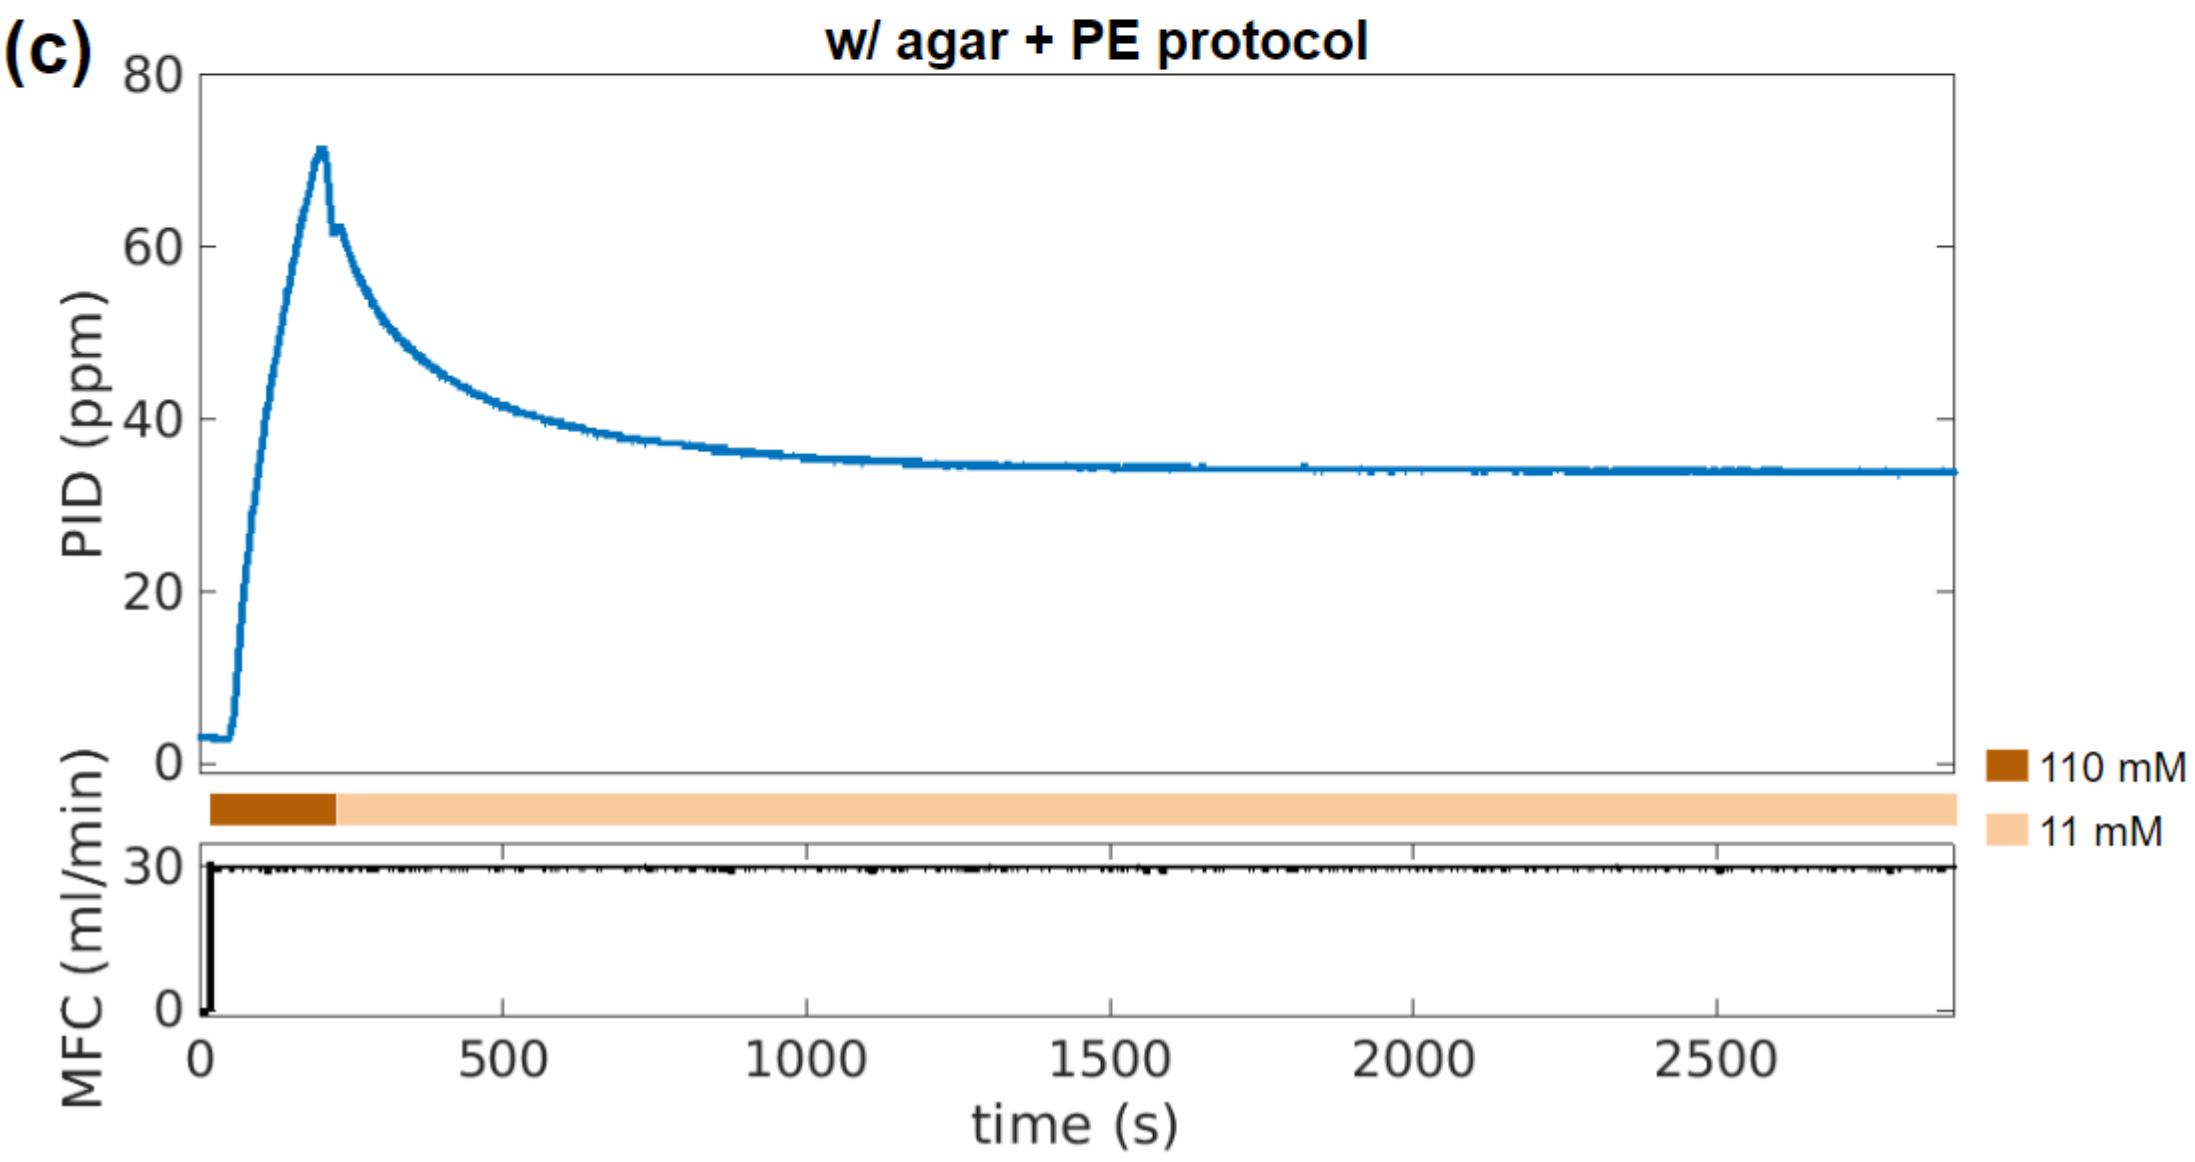

Supplement: supp [file elife_poa_e85910_Figure_4_figure_supplement_1.pdf › elife_poa_e85910_Figure_4_figure_supplement_1.pdf]

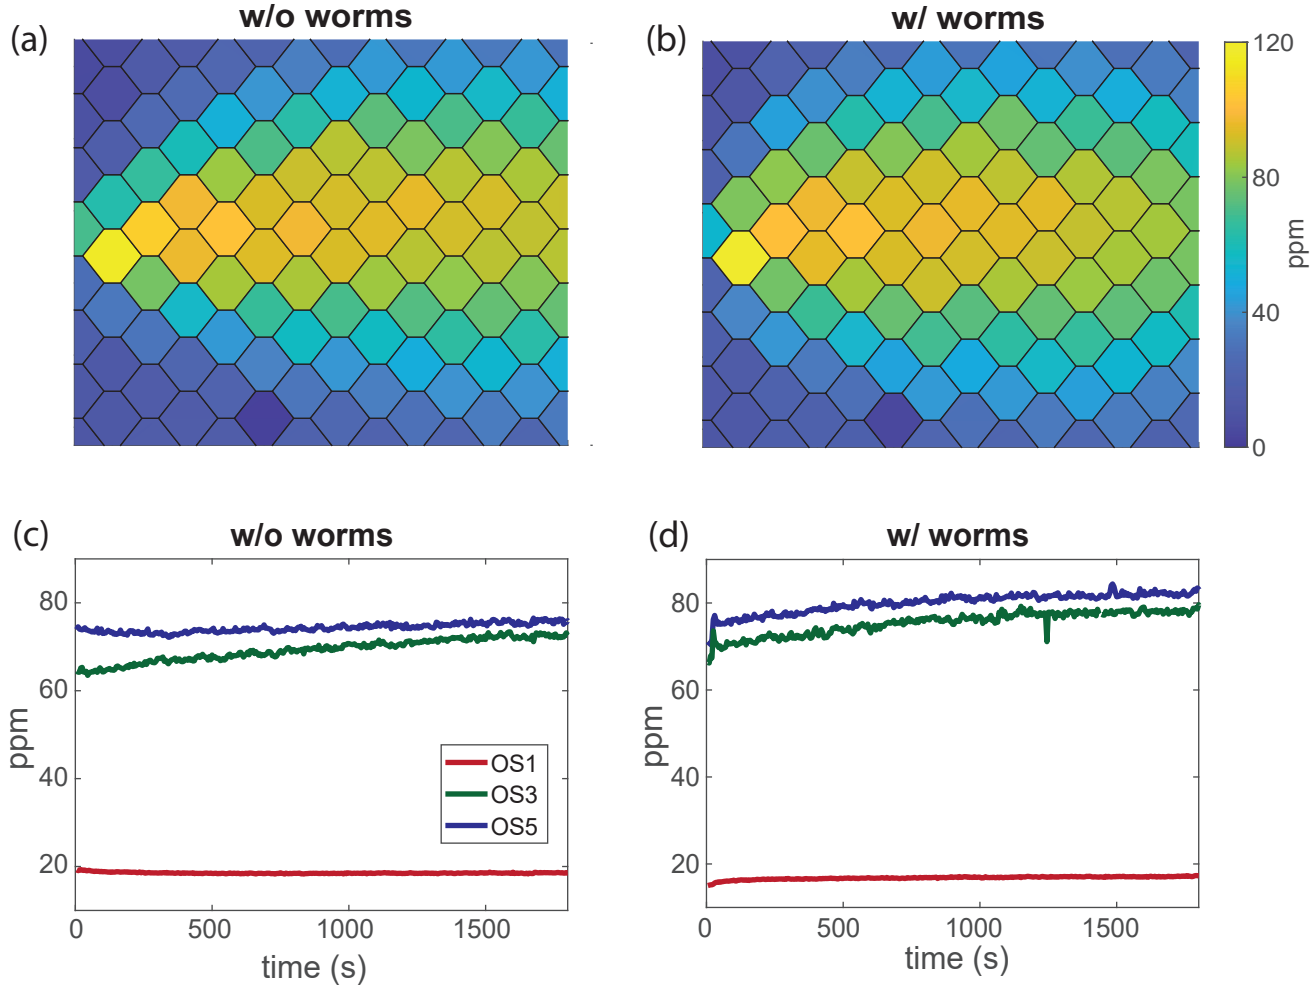

Supplement: supp [file elife_poa_e85910_Figure_6_figure_supplement_1.pdf › elife_poa_e85910_Figure_6_figure_supplement_1.pdf]

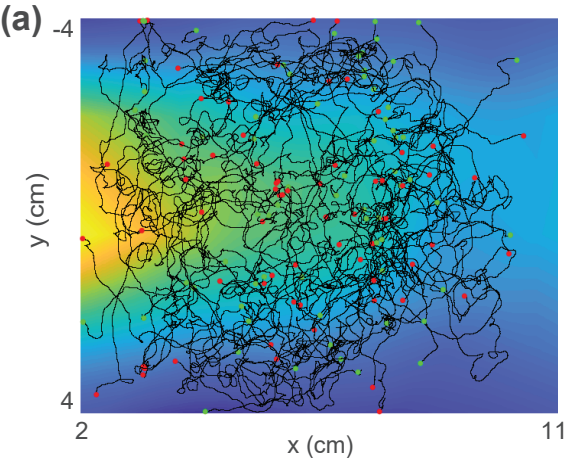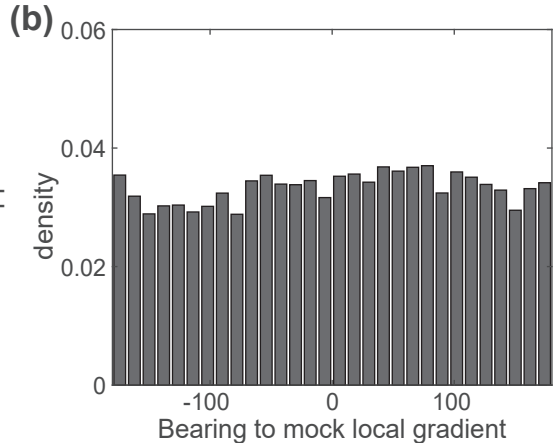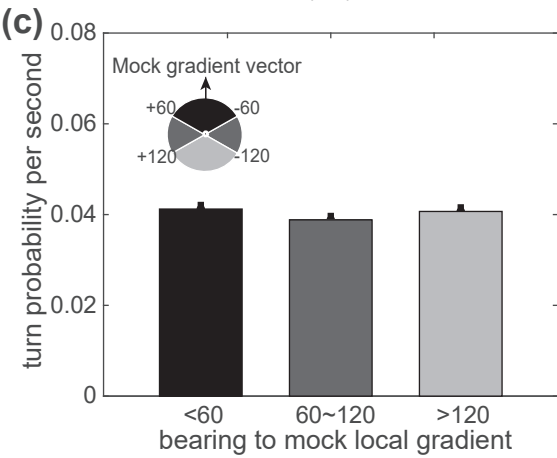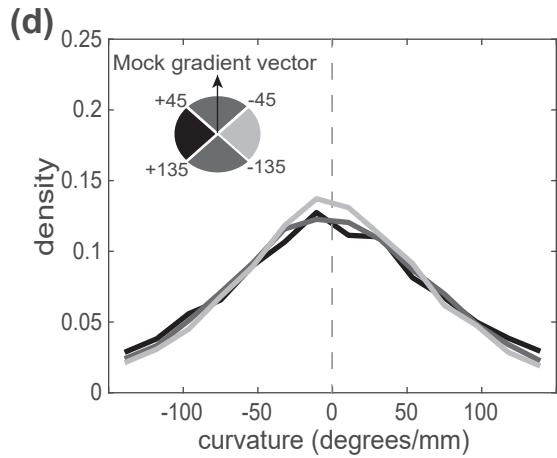

Supplement: supp [file elife_poa_e85910_Figure_7_figure_supplement_1.pdf › elife_poa_e85910_Figure_7_figure_supplement_1.pdf]

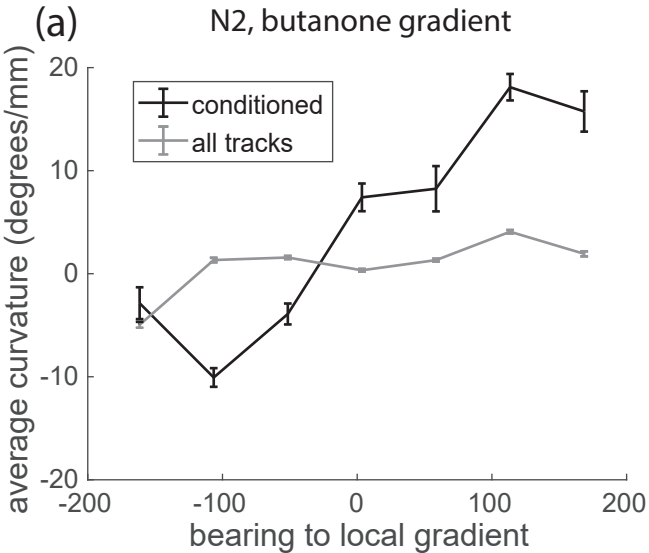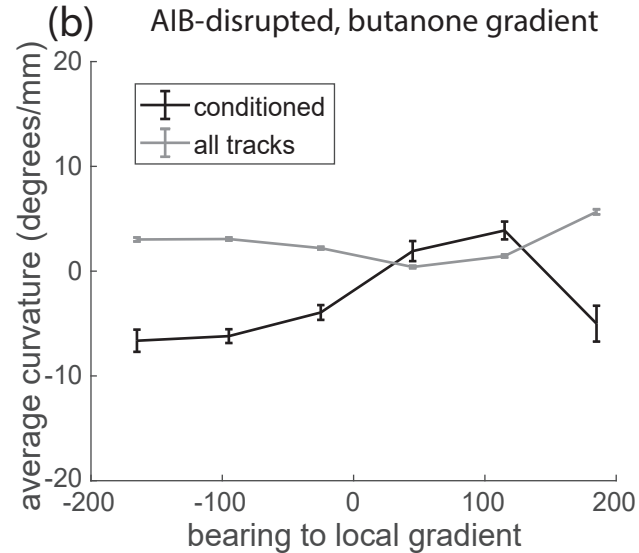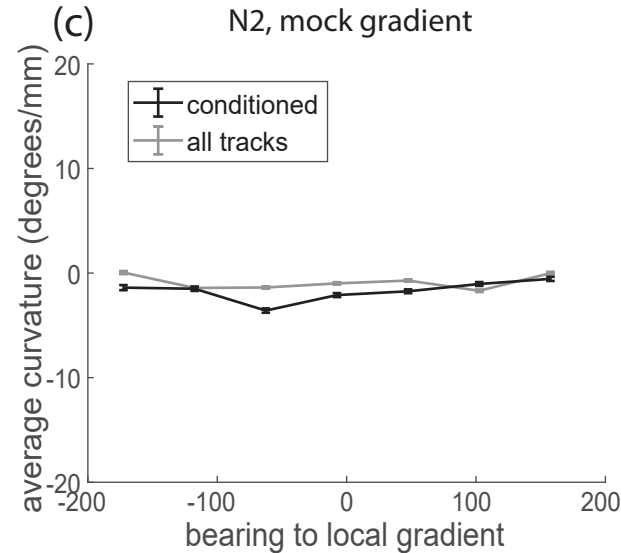

Supplement: supp [file elife_poa_e85910_Figure_7_figure_supplement_2.pdf › elife_poa_e85910_Figure_7_figure_supplement_2.pdf]
